# Supplementary material
Source: PubMed Central journal article supplement (PMC4310550)
Supplement: NIHMS656849-supplement-Supplementary.pdf [file NIHMS656849-supplement-Supplementary.pdf]

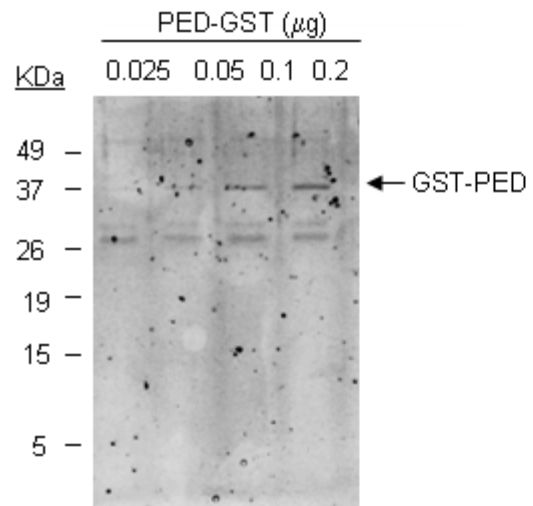

**Supplementary Fig. 1. Purified recombinant GST-PED fusion protein.** Increasing amounts of GST-PED were resolved on SDS-PAGE and detected with SyproRuby staining.

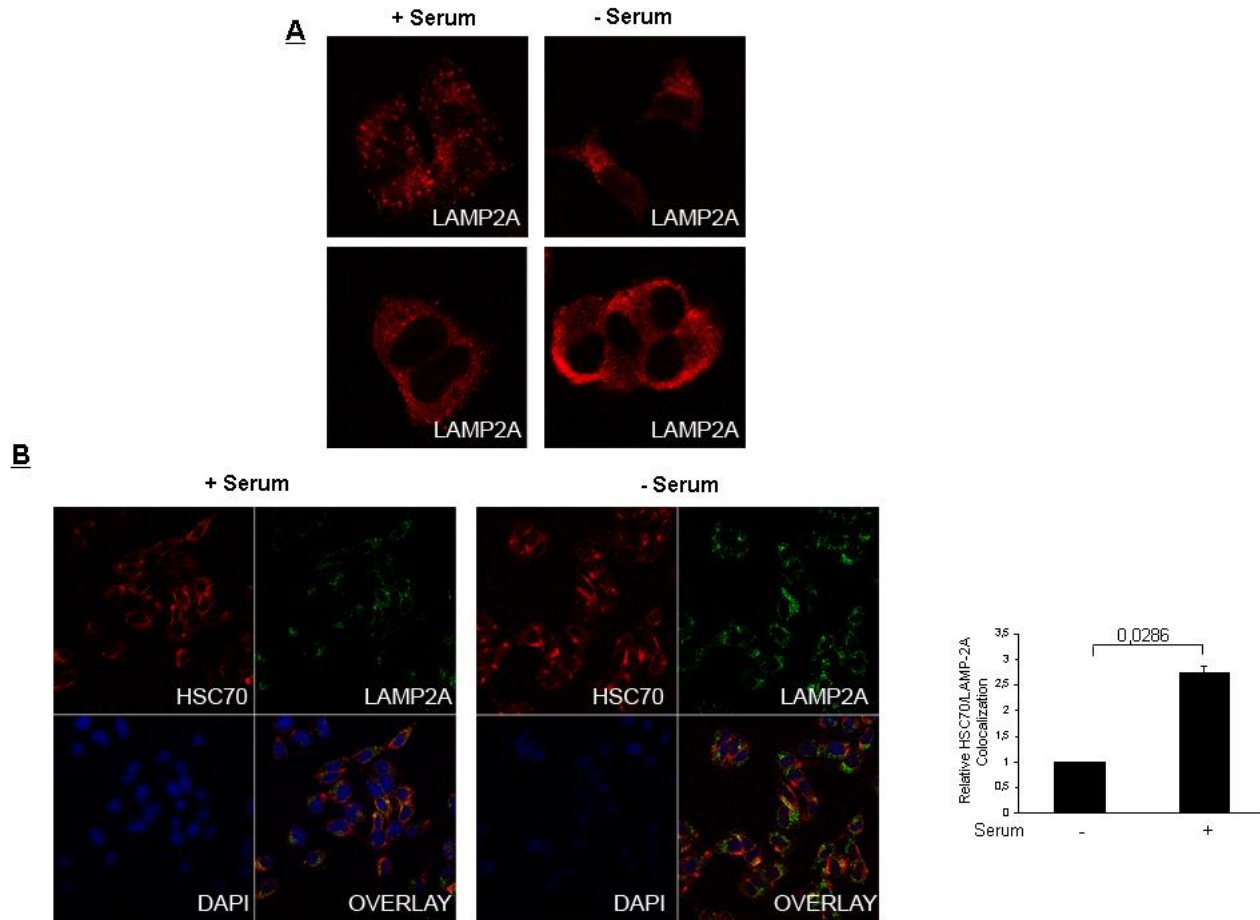

Supplementary Figure 2

**Supplementary Fig. 2. Chaperone-mediated autophagy in A549 cells.** **A:** A549 cells were serum-starved or not for 24 h and then fixed with 4% paraformaldehyde. Cells were then incubated with anti-LAMP2A and Alexa Fluor 594-conjugated anti-rabbit antibodies to verify the localization of lysosomes involved in CMA (red signal). LAMP2A-positive lysosomes relocated to the perinuclear region, indicative of CMA activation, when cells were subjected to serum starvation (right panels). **B:** After prolonged (24 h) serum starvation, LAMP2A and HSC70 co-localization was significantly enhanced in A549 cells, indicating an increase in the number of lysosomes involved in CMA. HSC70 in red (anti-mouse Alexa Fluor 594-conjugated antibody); LAMP2A in green (anti-rabbit Alexa Fluor 488-conjugated antibody); DAPI was used to stain nuclei. Quantitative analysis of LAMP2A–HSC70 co-localization is given in the graph (bars represent mean  $\pm$  standard deviation). Statistical analysis is Student's t test.
